# Supplementary material
Source: PubMed Central journal article supplement (PMC8665121)
Supplement: NIHMS1759609-supplement-1.pdf [file NIHMS1759609-supplement-1.pdf]

## Supplementary Material: Mass Spectrometry Instrument Settings

Orbitrap Fusion Method  
Summary

### Global Settings

Use Ion Source Settings from Tune = False

Method Duration (min)= 133

Ion Source Type = NSI

Sweep Gas (Arb) = 0

Ion Transfer Tube Temp (°C) = 275

APPI Lamp = Not in use

Positive Spray Voltage (V):

| Start (min) | Voltage (V) |
|-------------|-------------|
| 0           | 1900        |

Negative Spray Voltage (V):

| Start (min) | Voltage (V) |
|-------------|-------------|
| 0           | 0           |

Pressure Mode = Standard

Default Charge State = 1

### Experiment 1

Start Time (min) = 17

End Time (min) = 133

Cycle Time (sec) = 5

Scan MasterScan

MSn Level = 1

Use Wide Quad Isolation = True

Detector Type = Orbitrap

Orbitrap Resolution = 120K

Mass Range =Normal

Scan Range (m/z) = 375-1575

Maximum Injection Time (ms) = 50

AGC Target = 500000

Microscans = 1

RF Lens (%) = 60

Use ETD Internal Calibration = False

DataType = Centroid

Polarity = Positive

Source Fragmentation = False

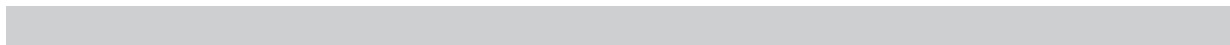

Scan Description =

Filter MIPS

MIPS Mode =Peptide

Filter Intensity Threshold

Maximum Intensity = 1E+20

Use Signal Intensity Range =False

Minimum Intensity = 50000

Filter Charge State

Include undetermined charge states = False

Include charge state(s) = 2-6

Include charge states 25 and higher = False

Filter Dynamic Exclusion

Exclude after n times = 1

Exclusion duration (s) = 45

Mass Tolerance =ppm

Mass tolerance low = 10

Mass tolerance high = 10

Exclude isotopes = True

Perform dependent scan on single charge state per precursor only = False

Filter Targeted Exclusion MassList

Ignore charge state requirement for unassigned ions = False

>>>>>>>>>>>> Mass List Table <<<<<<<<<<<<<<<<<<<<<<<<<<<<<

    m/z|        z| CompoundName|

#####

Data Dependent Properties

Data Dependent Mode= Cycle Time

Scan Event 1

Scan ddMSnScan

MSn Level = 2

Isolation Mode = Quadrupole

Isolation Window = 0.8

Use Isolation m/z Offset = False

Multi-notch Isolation = False

Scan Range Mode = Auto Normal

FirstMass = 120

Scan Priority= 1

ActivationType = HCD

Is Stepped Collision Energy On = False

Stepped Collision Energy (%) = 5

Collision Energy (%) = 34

Is EThcD Active = False

Detector Type = IonTrap  
Ion Trap Scan Rate = Rapid  
Maximum Injection Time (ms) = 35  
AGC Target = 10000  
Inject ions for all available parallelizable time = True  
Microscans = 1  
Use ETD Internal Calibration = False  
DataType = Centroid  
Polarity = Positive  
Source Fragmentation = False  
Scan Description =

Journal Pre-proof
